# Supplementary material for: Influence of the Size and Type of Pores on Brick Resistance to Freeze-Thaw Cycles
Source: MDPI journal article supplement (doi:10.3390/ma13173717), 2020-08-22
Supplement: s1 [file s1]

# Influence of the Size and Type of Pores on Brick Resistance to Freeze-Thaw Cycles

Ivanka Netinger Grubeša <sup>1,\*</sup>, Martina Vračević <sup>2,\*</sup>, Vilma Ducman <sup>3</sup>, Berislav Marković <sup>4</sup>, Imre Szenti <sup>5</sup> and Ákos Kukovecz <sup>5</sup>

<sup>1</sup> Faculty of Civil Engineering and Architecture Osijek, Josip Juraj Strossmayer University of Osijek, Vladimira Preloga 3, 31000 Osijek, Croatia

<sup>2</sup> Institute IGH, Janka Rakuše 1, 10000 Zagreb, Croatia

<sup>3</sup> Slovenian National Building and Civil Engineering Institute, Dimičeva Ulica 12, 1000 Ljubljana, Slovenia; vilma.ducman@zag.si

<sup>4</sup> Department of Chemistry, Josip Juraj Strossmayer University of Osijek, Ulica Cara Hadrijana 8/A, 31000 Osijek, Croatia; bmarkovi@kemija.unios.hr

<sup>5</sup> Interdisciplinary Excellence Centre, Department of Applied and Environmental Chemistry, University of Szeged, H-6720, Rerrich Béla tér 1, 6720 Szeged, Hungary; szentiimre@gmail.com (I.S.); kakos@chem.u-szeged.hu (Á.K.)

\* Correspondence: nivanka@gfos.hr (I.N.G.); martina.vracevic@igh.hr (M.V.)

Received: 29 June 2020; Accepted: 17 August 2020; Published: 22 August 2020

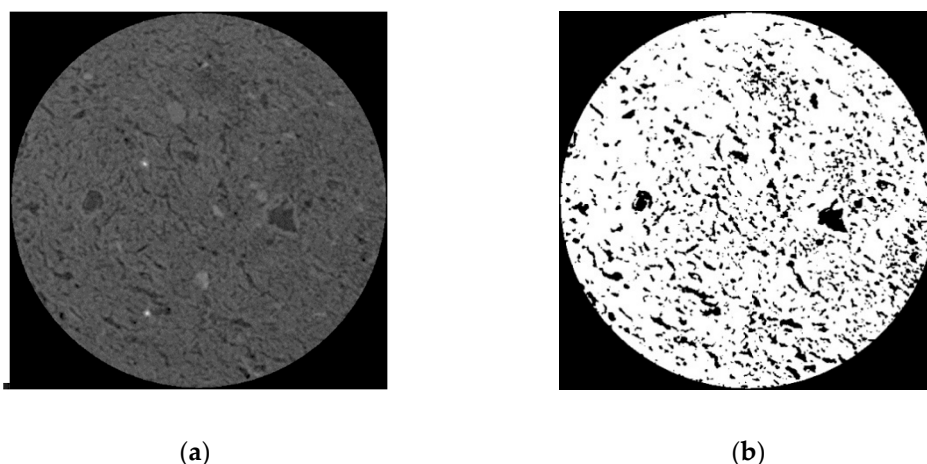

**Figure S1.** Example of cross-sectional slice as measured by micro-CT (a), and the corresponding processed binary image (b) used in the quantitative image analysis.

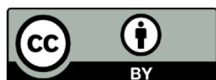

© 2020 by the authors. Licensee MDPI, Basel, Switzerland. This article is an open access article distributed under the terms and conditions of the Creative Commons Attribution (CC BY) license (<http://creativecommons.org/licenses/by/4.0/>).
